# Supplementary figures and images for: Cardamonin inhibits osteogenic differentiation of human valve interstitial cells and ameliorates aortic valve calcification via interfering in the NF-κB/NLRP3 inflammasome pathway
Source: Royal Society of Chemistry journal article supplement (doi:10.1039/d1fo00813g), 2021-01-01

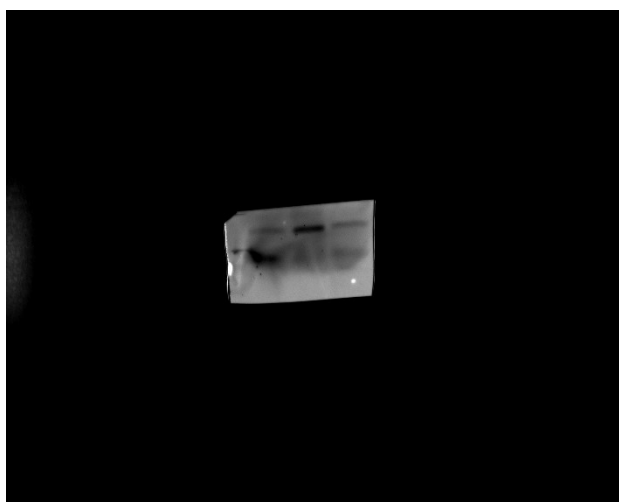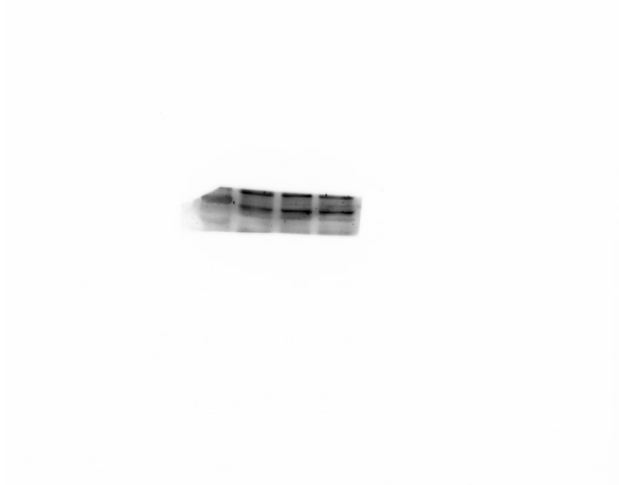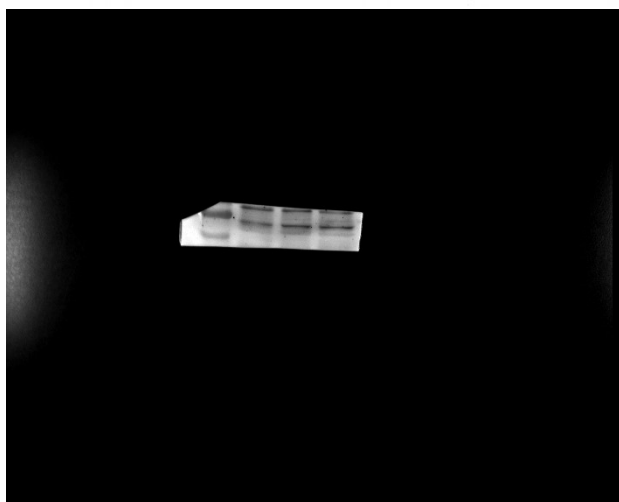

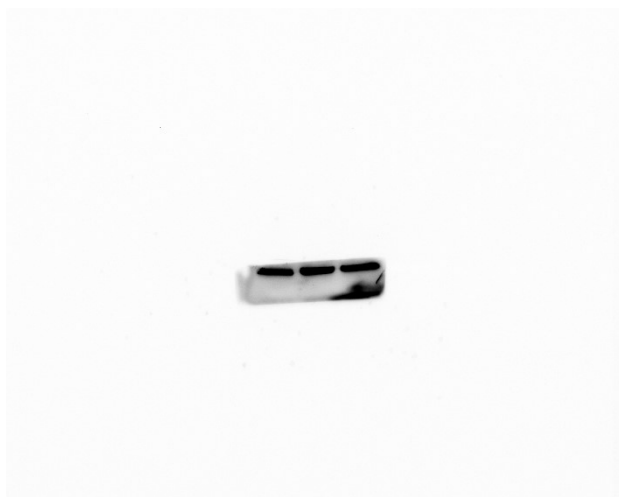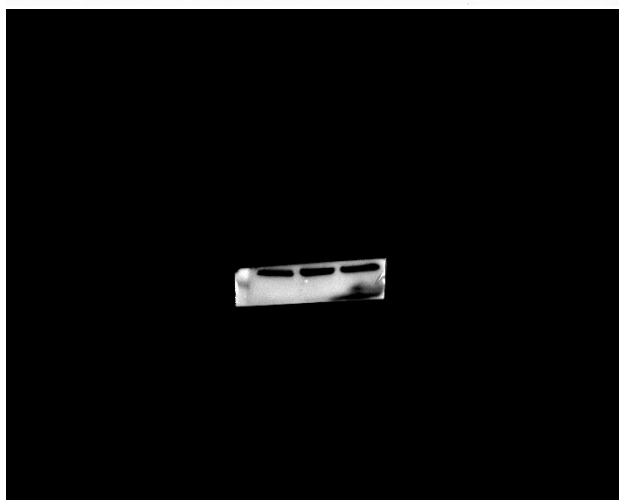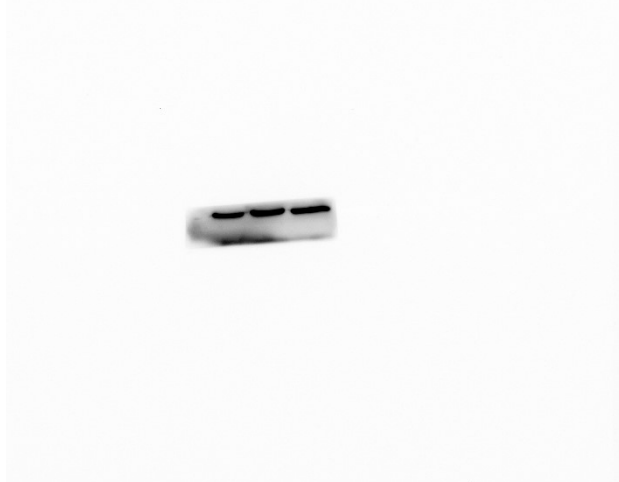

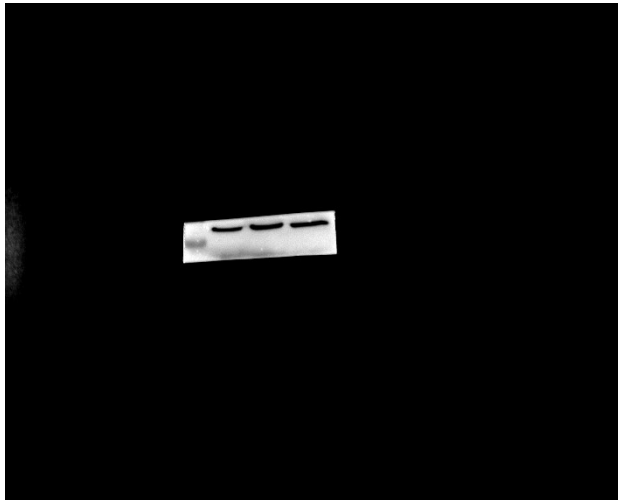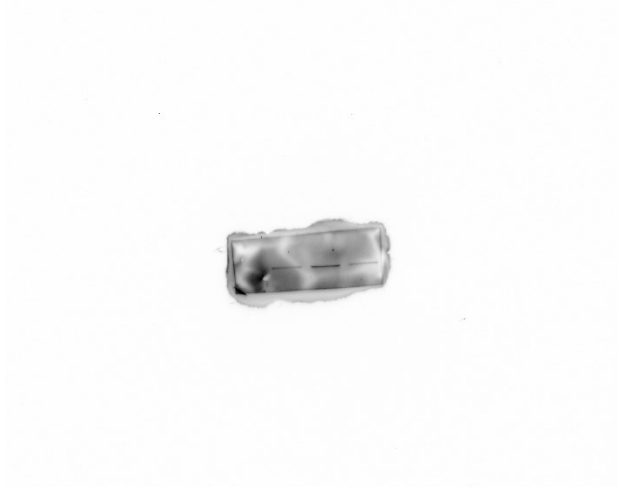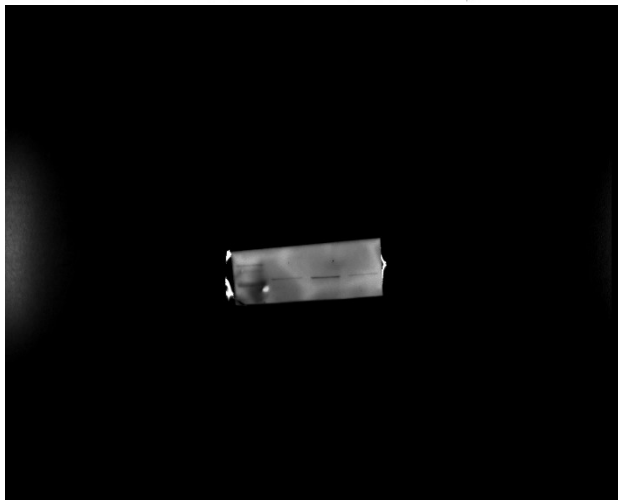

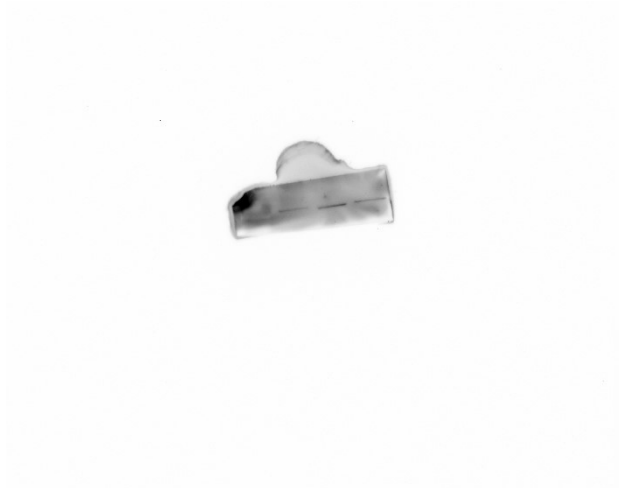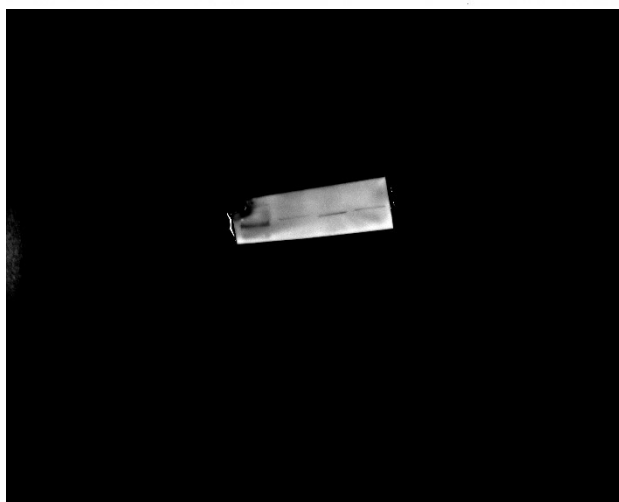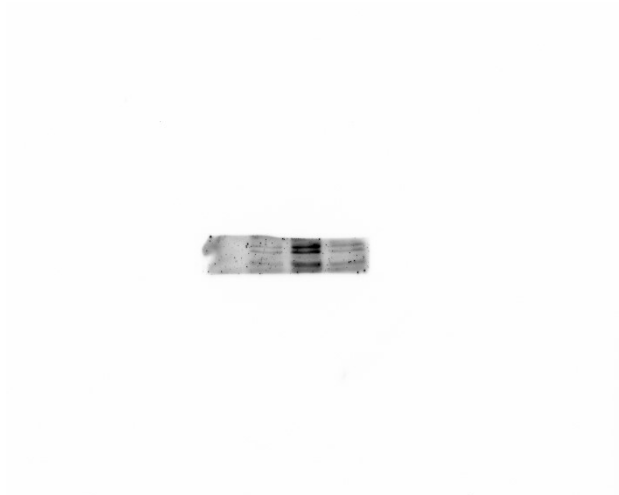

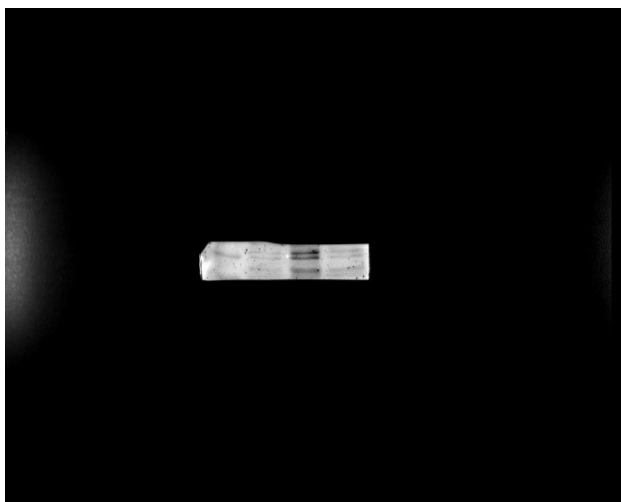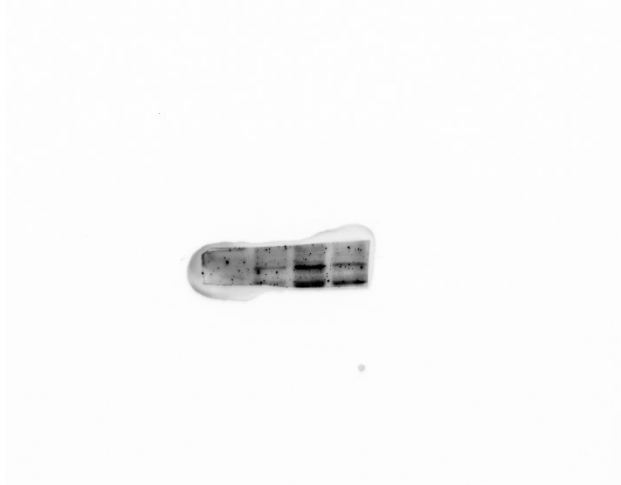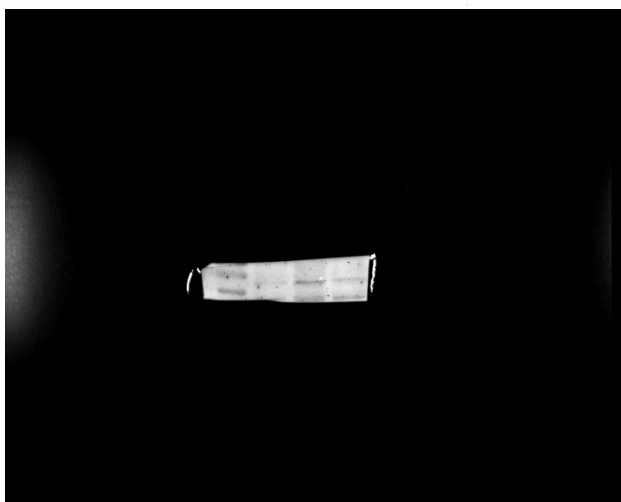

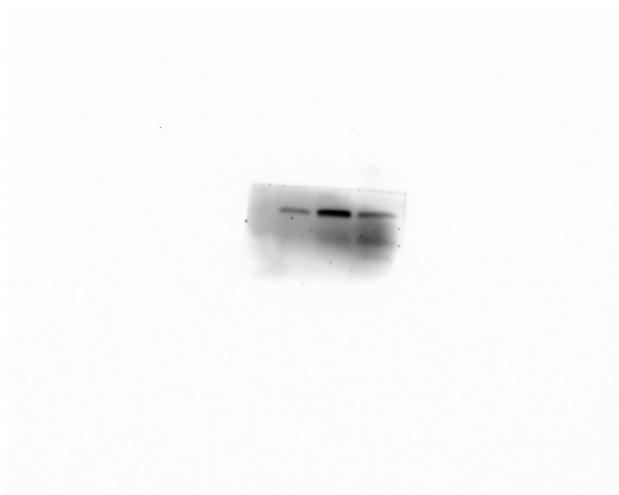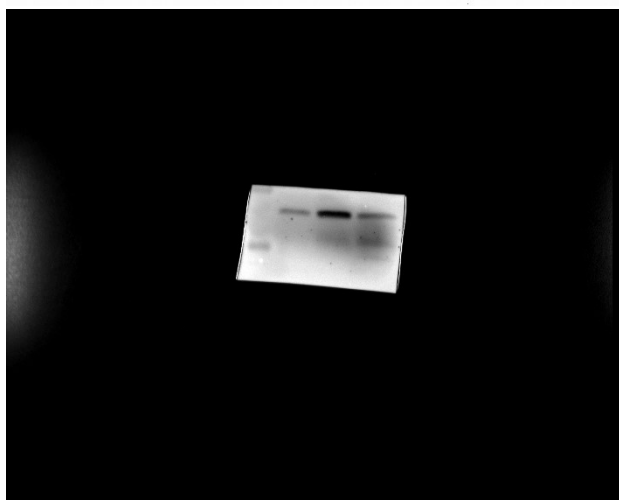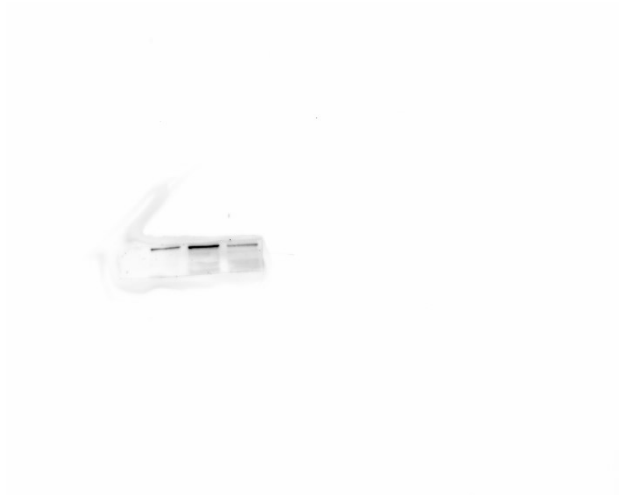

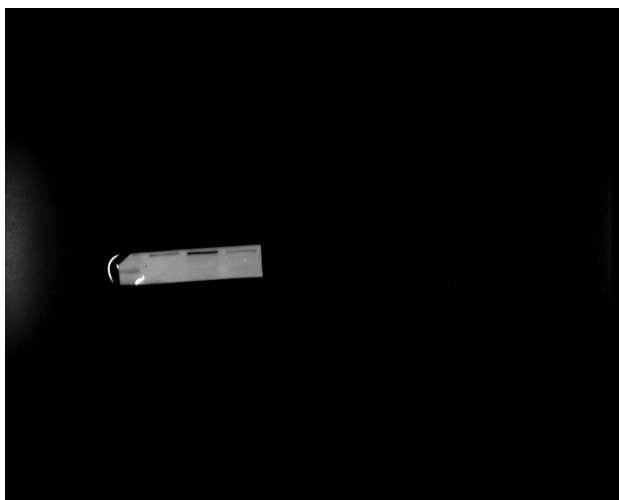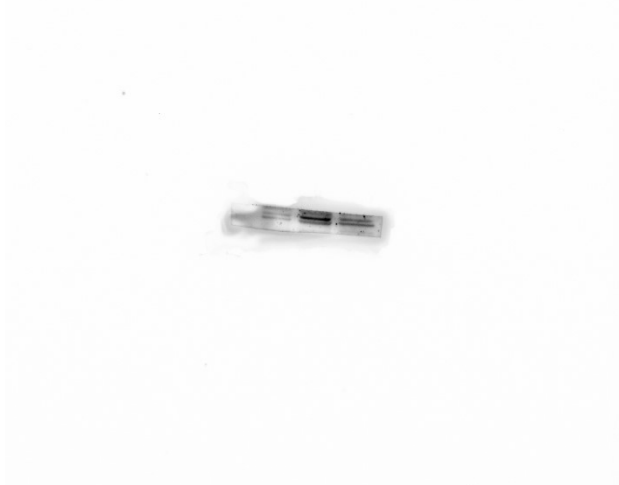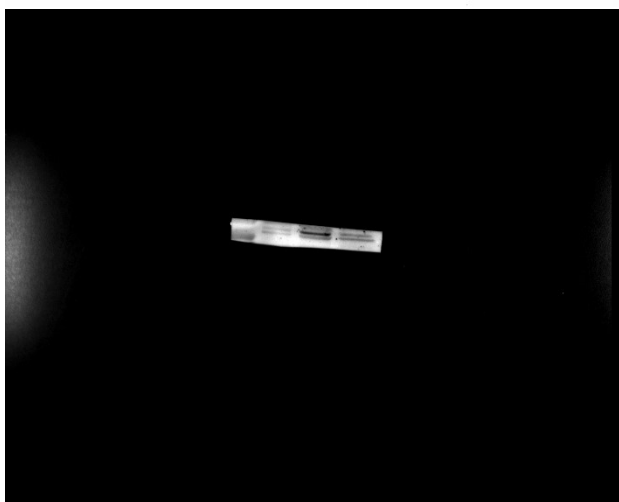

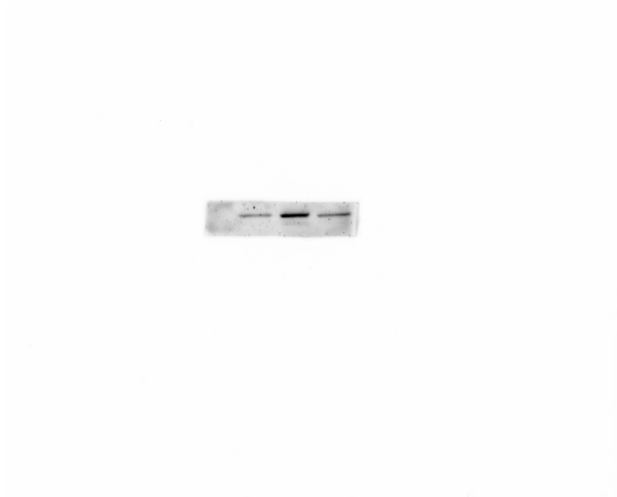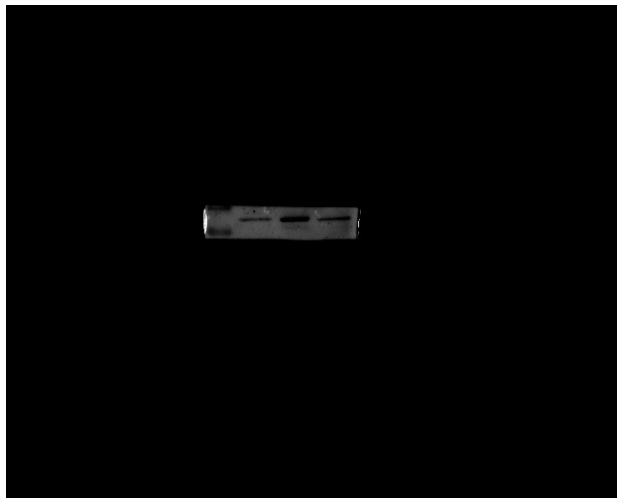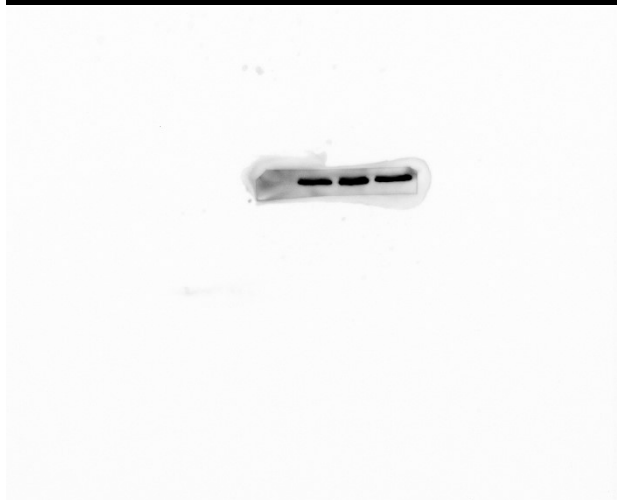



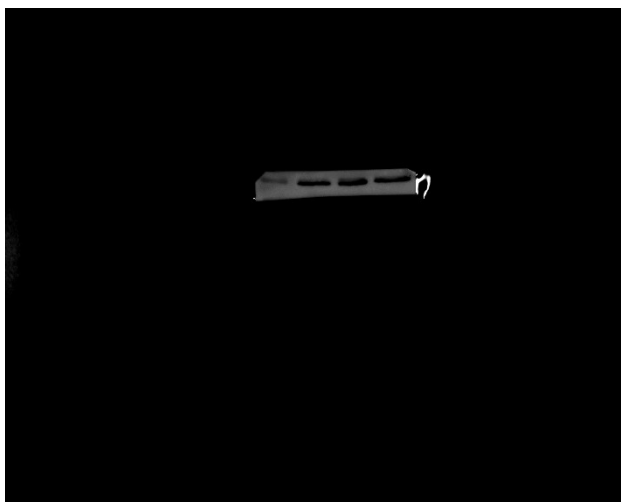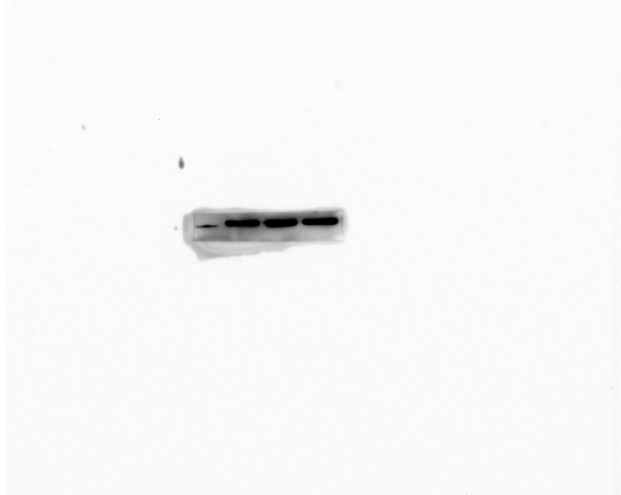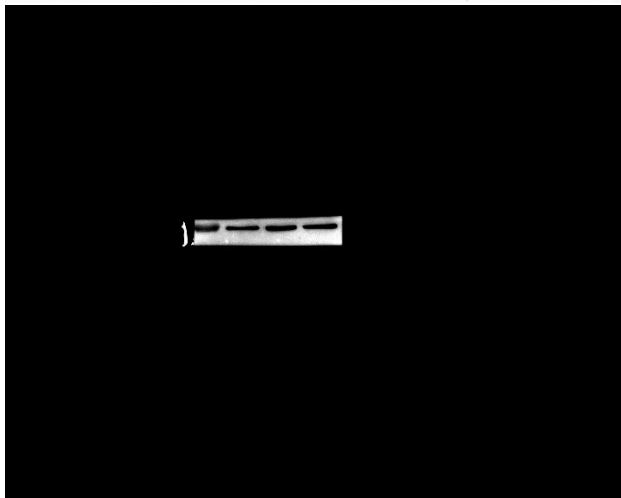

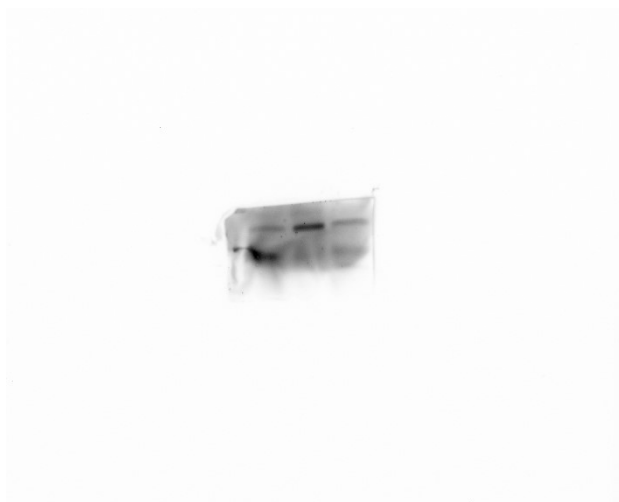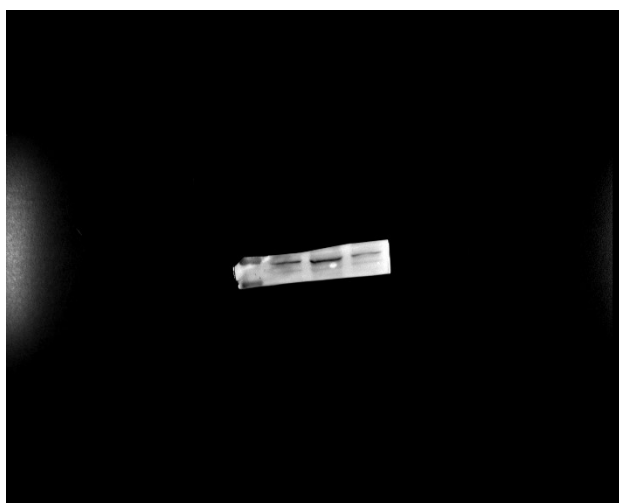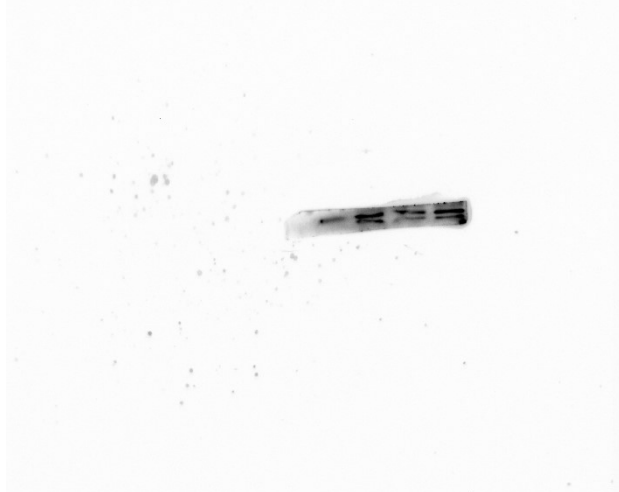

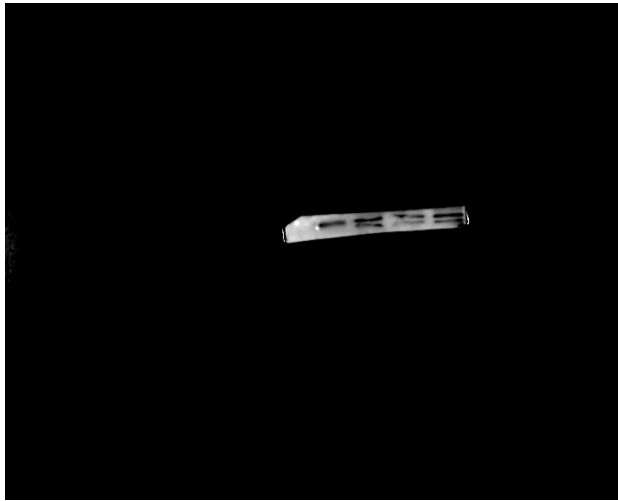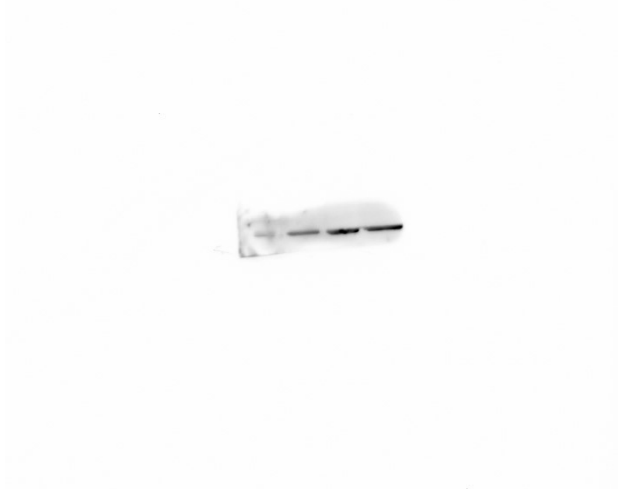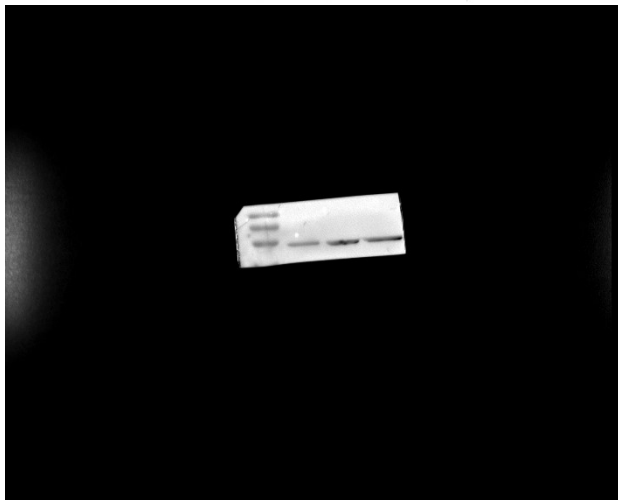

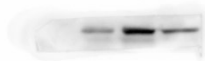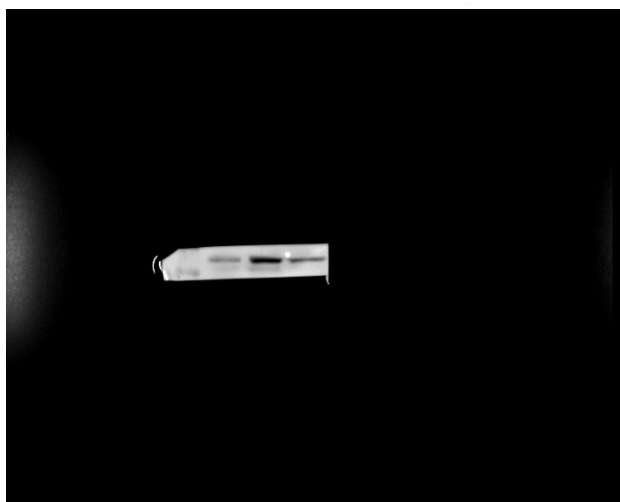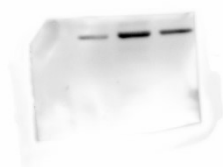

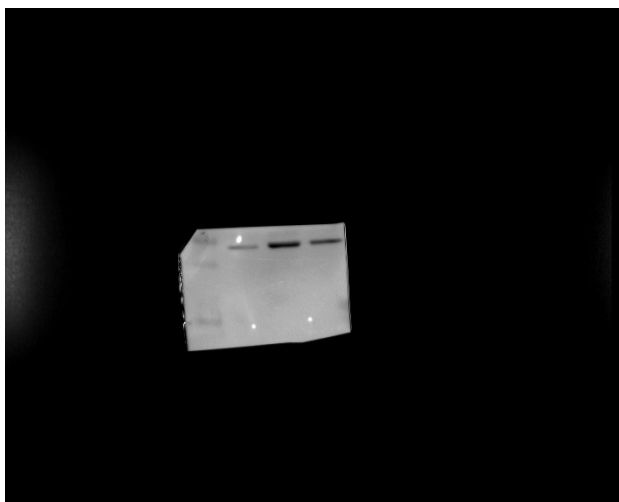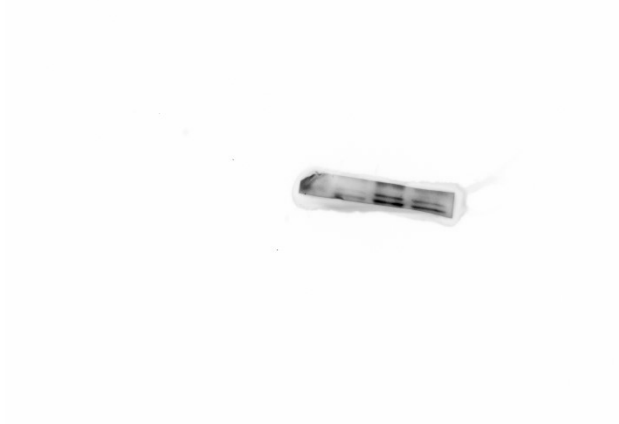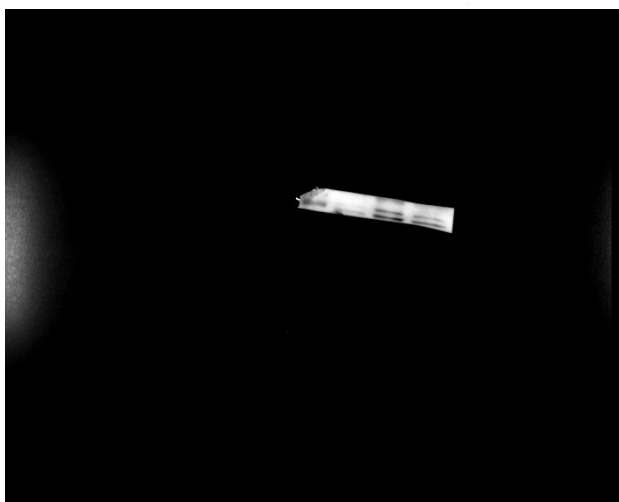

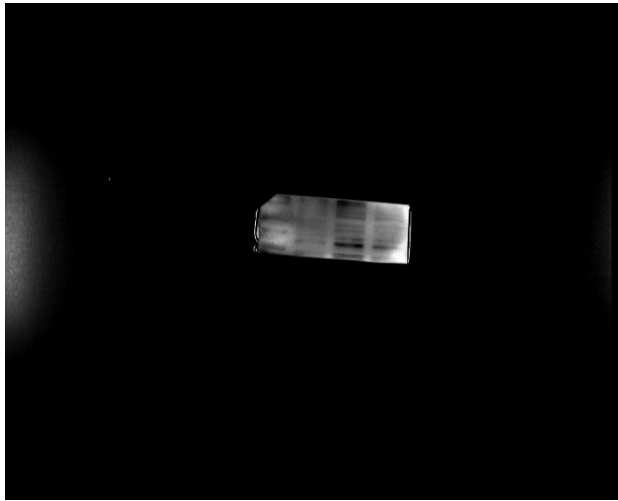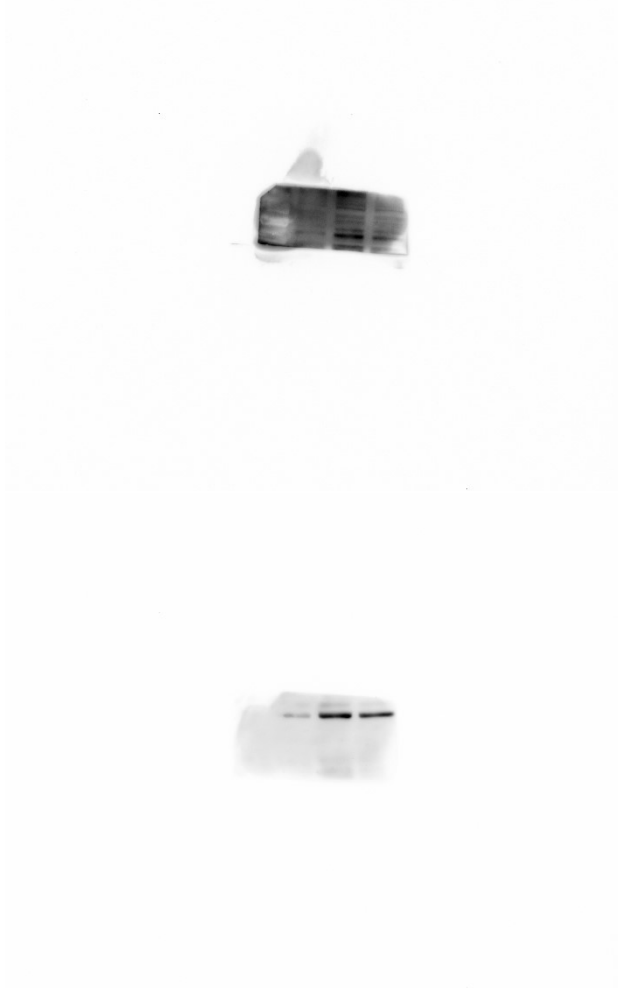

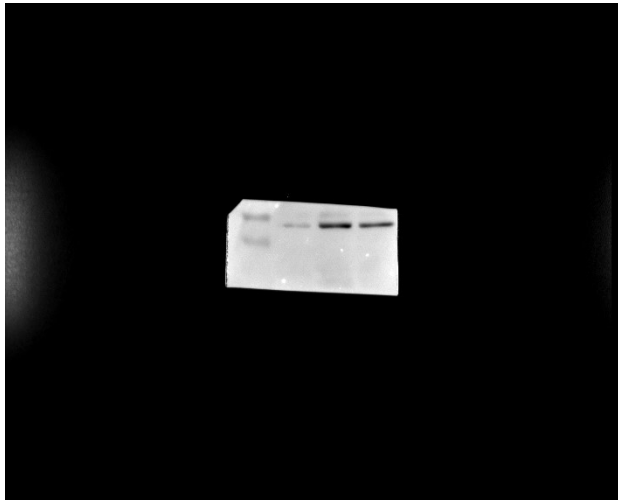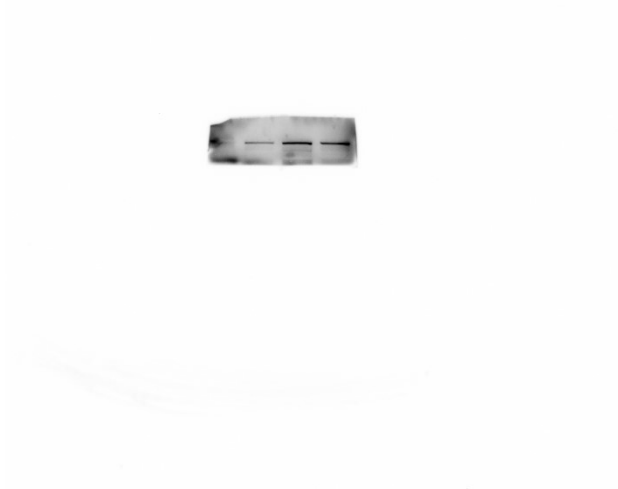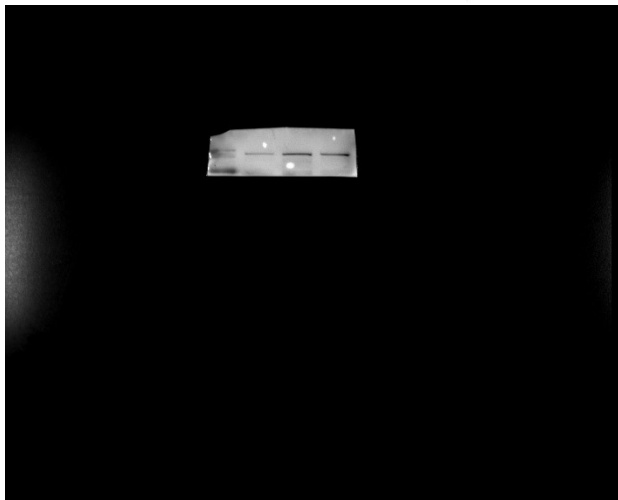

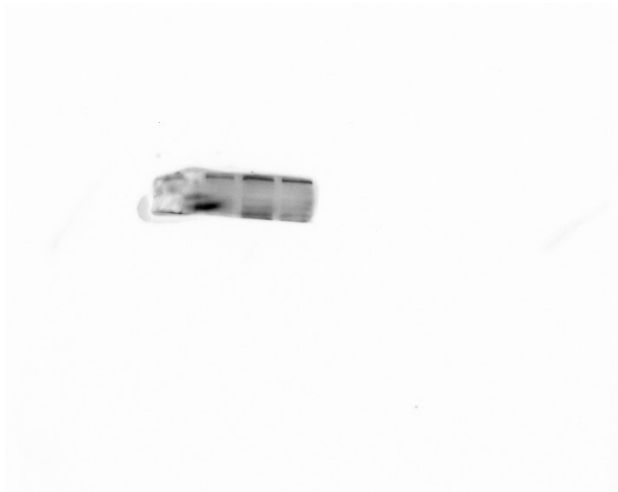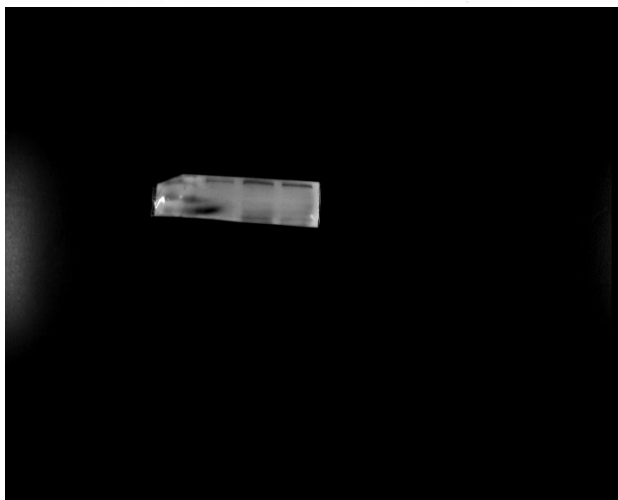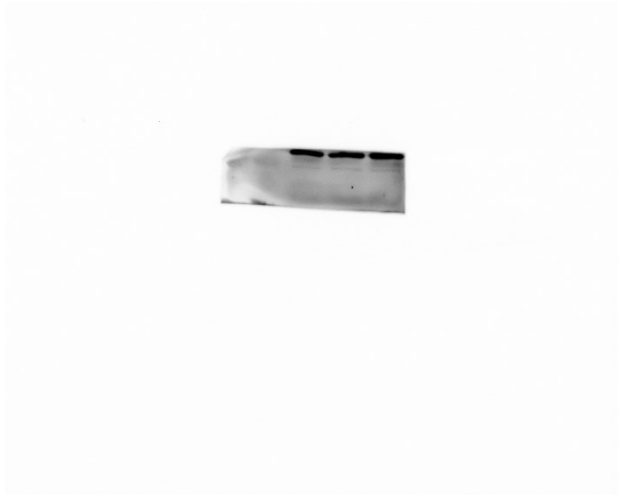



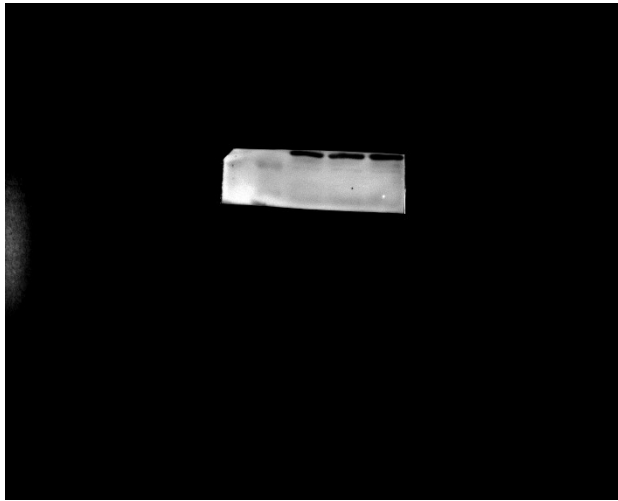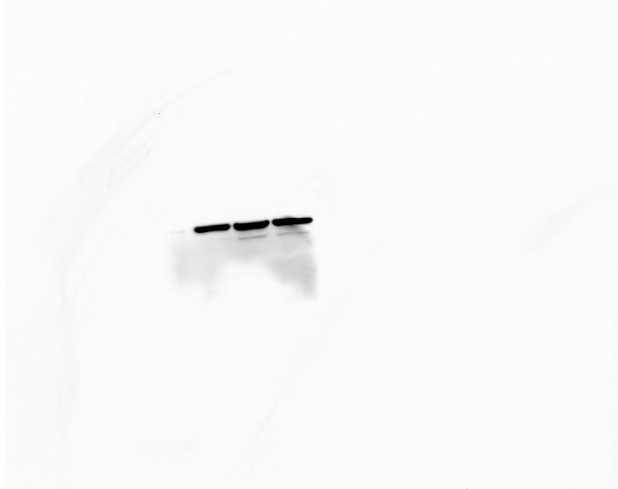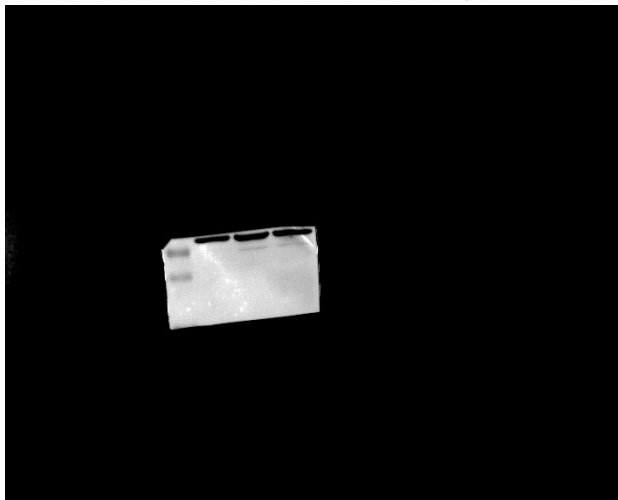

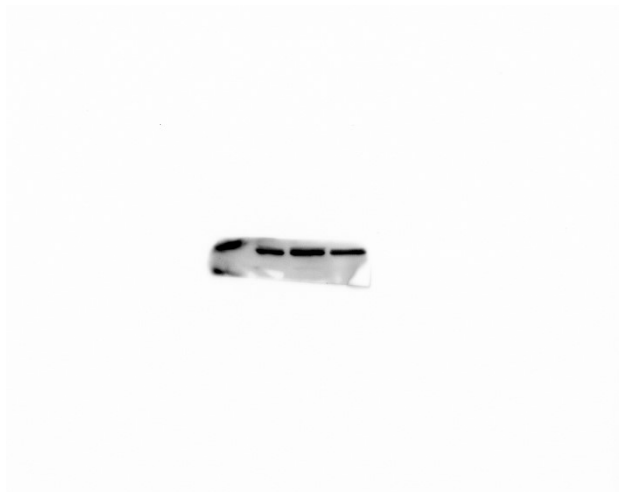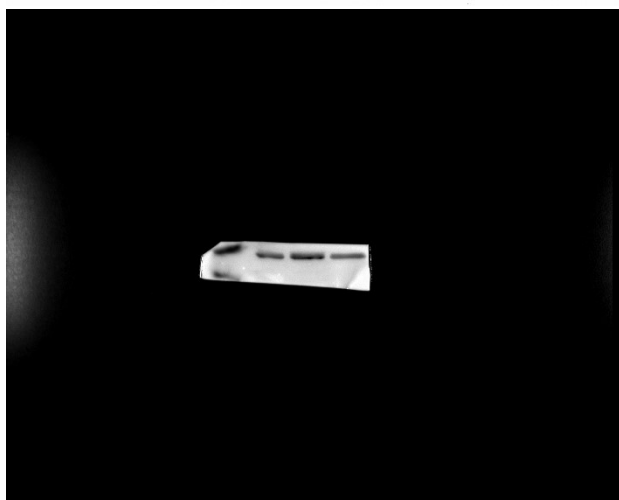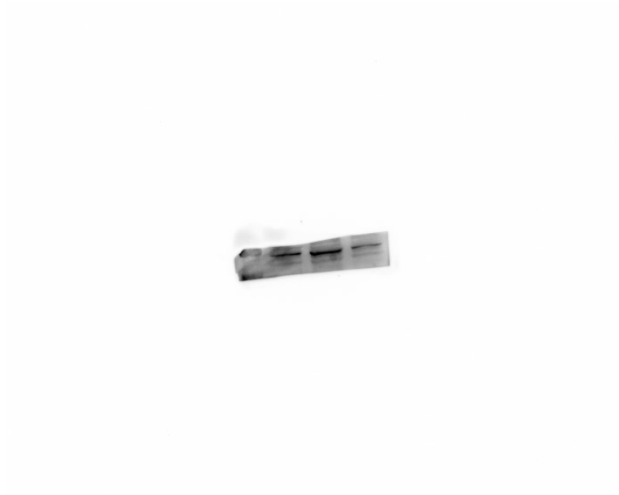

Supplement: d1fo00813g1.pdf [file d1fo00813g1.pdf]
